# Supplementary material for: Phage-Mediated Acquisition of a Type III Secreted Effector Protein Boosts Growth of Salmonella by Nitrate Respiration
Source: PubMed Central journal article supplement — mBio. 2012 Jun 12;3(3):e00143-12. doi: 10.1128/mBio.00143-12 (PMC3374392; doi:10.1128/mbio.00143-12), 2012-06-12
Supplement: mbo003121284st1.pdf [file mbo003121284st1.pdf]

**Table S1: Strains and plasmids used in this study****S. Typhimurium strains**

|        |                                                                                       |            |
|--------|---------------------------------------------------------------------------------------|------------|
| IR715  | Nalidixic acid-resistant derivative of ATCC 14028                                     | (9)        |
| SL1344 | ST4/74 <i>his</i>                                                                     | (2, 7)     |
| AJB715 | IR715 $\Delta$ <i>phoN</i> ::Kan <sup>R</sup>                                         | (3)        |
| M30    | ATCC 14028 SopE $\Phi$ Kan <sup>R</sup>                                               | (11)       |
| SPN450 | IR715 $\Delta$ <i>spiB</i> ::Kan <sup>R</sup>                                         | (6)        |
| SPN452 | IR715 $\Delta$ <i>invA</i> ::Tet <sup>R</sup> $\Delta$ <i>spiB</i> ::Kan <sup>R</sup> | (6)        |
| SPN456 | IR715 $\Delta$ <i>spiB</i>                                                            | This study |
| SPN458 | IR715 $\Delta$ <i>spiB</i> ::pSPN56                                                   | This study |
| SW562  | IR715 $\Delta$ <i>invA</i> ::Tet <sup>R</sup>                                         | (10)       |
| SW661  | IR715 <i>ttrA</i> ::pSW171                                                            | (10)       |
| SW975  | SL1344 $\Delta$ <i>sopE</i> ::Kan <sup>R</sup>                                        | This study |
| SW976  | SL1344 $\Delta$ <i>sopE</i>                                                           | This study |
| CAL27  | IR715 <i>narG</i> ::pCAL5                                                             | This study |
| CAL34  | IR715 $\Delta$ <i>narZ</i> ::Kan <sup>R</sup>                                         | This study |
| CAL40  | IR715 $\Delta$ <i>narZ</i>                                                            | This study |
| CAL42  | IR715 $\Delta$ <i>napA</i> ::Kan <sup>R</sup>                                         | This study |
| CAL45  | IR715 $\Delta$ <i>narZ</i> ::pCAL10                                                   | This study |
| CAL46  | IR715 $\Delta$ <i>napA</i>                                                            | This study |
| CAL50  | IR715 $\Delta$ <i>napA</i> $\Delta$ <i>narZ</i> <i>narG</i> ::pCAL5                   | This study |
| CAL51  | SL1344 $\Delta$ <i>narZ</i>                                                           | This study |
| CAL55  | SL1344 $\Delta$ <i>napA</i> $\Delta$ <i>narZ</i> <i>narG</i> ::pCAL5                  | This study |

|        |                                                                                                     |            |
|--------|-----------------------------------------------------------------------------------------------------|------------|
| CAL63  | SL1344 $\Delta phoN::Kan^R$                                                                         | This study |
| CAL64  | SL1344 $\Delta phoN::Kan^R \Delta napA \Delta narZ narG::pCAL5$                                     | This study |
| CAL65  | SL1344 $narG::pCAL5$                                                                                | This study |
| CAL66  | SL1344 $\Delta phoN::Kan^R ttrA::pSW171$                                                            | This study |
| CAL67  | SL1344 $\Delta napA$                                                                                | This study |
| CAL74  | SL1344 $\Delta sopE::pSW245$                                                                        | This study |
| CAL85  | SL1344 $\Delta phoN::Kan^R \Delta invA::Tet^R \Delta spiB$<br>$\Delta napA \Delta narZ narG::pCAL5$ | This study |
| CAL86  | SL1344 $\Delta phoN::Kan^R \Delta invA::Tet^R \Delta spiB$                                          | This study |
| CAL87  | IR715 $\Delta napA \Delta narZ narG::pCAL5$<br>$\Delta invA::Tet^R \Delta spiB$                     | This study |
| CAL88  | SL1344 $\Delta phoN::Kan^R \Delta sopE$                                                             | This study |
| CAL89  | SL1344 $\Delta phoN::Kan^R \Delta napA \Delta narZ narG::pCAL5$<br>$\Delta sopE$                    | This study |
| CAL98  | IR715 SopE1 $\Phi$ $Kan^R \Delta napA \Delta narZ narG::pCAL5$                                      | This study |
| CAL99  | IR715 SopE1 $\Phi$ $Kan^R$                                                                          | This study |
| CAL102 | IR715 SopE1 $\Phi$ $Kan^R \Delta sopE$                                                              | This study |
| CAL103 | IR715 SopE1 $\Phi$ $Kan^R \Delta sopE \Delta napA \Delta narZ$<br>$narG::pCAL5$                     | This study |
| CAL117 | IR715 $\Delta napA::pCAL9$                                                                          | This study |

---

***E. coli* strains**

---

DH5 $\alpha$   $\lambda pir$       F<sup>-</sup> *endA1 hsdR17 (r<sup>-</sup>m<sup>+</sup>) supE44 thi-1*      (1)

|                            |                                                                                       |            |
|----------------------------|---------------------------------------------------------------------------------------|------------|
|                            | <i>recA1 gyrA relA1 Δ(lacZYA-argF)<sub>U189</sub></i>                                 |            |
|                            | $\Phi$ 80 <i>lacZΔM15 λpir</i>                                                        |            |
| S17-1 $\lambda$ <i>pir</i> | C600:: <i>RP4 2-(Tet::<i>Mu</i>) (Kan::<i>Tn7)</i> <math>\lambda</math><i>pir</i></i> | (8)        |
|                            | <i>recA1 thi pro hsdR (r<sup>m+</sup>)</i>                                            |            |
| TOP10                      | $\Phi$ 80 <i>lacZΔM15 lacX74 recA1 araD139</i>                                        | Invitrogen |
|                            | $\Delta$ ( <i>ara-leu</i> ) 7697 <i>galU galK rpsL endA1</i>                          |            |
|                            | <i>nupG</i>                                                                           |            |

---

**Plasmids:**

---

|           |                                                                                                 |                           |
|-----------|-------------------------------------------------------------------------------------------------|---------------------------|
| pCR2.1    | cloning vector                                                                                  | Invitrogen                |
| pGP704    | <i>ori</i> (R6K) <i>mobRP4</i> Carb <sup>R</sup>                                                | (5)                       |
| pRDH10    | <i>sacRB ori</i> (R6K) <i>mobRP4</i> Tet <sup>R</sup> Cm <sup>R</sup>                           | (4)                       |
| pUC4 KSAC | <i>ori</i> (pMB1) Carb <sup>R</sup> Kan <sup>R</sup>                                            | Pharmacia (GE Healthcare) |
| pSW172    | <i>ori</i> (R101) <i>repA101ts</i> Carb <sup>R</sup>                                            | This study                |
| pSW245    | pRDH10 with regions upstream and downstream of <i>sopE</i>                                      | This study                |
| pSW246    | pRDH10 with regions upstream and downstream of <i>sopE</i> flanking a Kan <sup>R</sup> cassette | This study                |
| pCAL1     | pCR2.1 with regions upstream and downstream of <i>narZ</i>                                      | This study                |
| pCAL3     | pCR2.1 with regions upstream and downstream of <i>napA</i>                                      | This study                |
| pCAL5     | pGP704 with regions upstream and                                                                | This study                |

|        |                                                                                                 |            |
|--------|-------------------------------------------------------------------------------------------------|------------|
|        | downstream of <i>narG</i>                                                                       |            |
| pCAL9  | pRDH10 with regions upstream and downstream of <i>napA</i>                                      | This study |
| pCAL10 | pRDH10 with regions upstream and downstream of <i>narZ</i>                                      | This study |
| pCAL11 | pRDH10 with regions upstream and downstream of <i>napA</i> flanking a Kan <sup>R</sup> cassette | This study |
| pCAL12 | pRDH10 with regions upstream and downstream of <i>narZ</i> flanking a Kan <sup>R</sup> cassette | This study |
| pSPN56 | pRDH10 with regions upstream and downstream of <i>spiB</i>                                      | (6)        |

---

#### References for Table S1:

1. **Grant, S. G. N., J. Jessee, F. R. Bloom, and D. Hanahan.** 1990. Differential plasmid rescue from transgenic mouse DNAs into *Escherichia coli* methylation-restriction mutants. Proc. Natl. Acad. Sci. USA **87**:4645-4649.
2. **Hoiseh, S. K., and B. A. Stocker.** 1981. Aromatic-dependent *Salmonella typhimurium* are non-virulent and effective as live vaccines. Nature **291**:238-9.
3. **Kingsley, R. A., A. D. Humphries, E. H. Weening, M. R. De Zoete, S. Winter, A. Papaconstantinou, G. Dougan, and A. J. Baumler.** 2003. Molecular and phenotypic analysis of the CS54 island of *Salmonella enterica* serotype typhimurium: identification of intestinal colonization and persistence determinants. Infection and immunity **71**:629-40.

4. **Kingsley, R. A., R. Reissbrodt, W. Rabsch, J. M. Ketley, R. M. Tsois, P. Everest, G. Dougan, A. J. Baumler, M. Roberts, and P. H. Williams.** 1999. Ferrioxamine-mediated Iron(III) utilization by *Salmonella enterica*. *Applied and environmental microbiology* **65**:1610-8.
5. **Miller, V. L., and J. J. Mekalanos.** 1988. A novel suicide vector and its use in construction of insertion mutations: osmoregulation of outer membrane proteins and virulence determinants in *Vibrio cholerae* requires *toxR*. *Journal of bacteriology* **170**:2575-83.
6. **Raffatellu, M., M. D. George, Y. Akiyama, M. J. Hornsby, S. P. Nuccio, T. A. Paixao, B. P. Butler, H. Chu, R. L. Santos, T. Berger, T. W. Mak, R. M. Tsois, C. L. Bevins, J. V. Solnick, S. Dandekar, and A. J. Baumler.** 2009. Lipocalin-2 resistance confers an advantage to *Salmonella enterica* serotype Typhimurium for growth and survival in the inflamed intestine. *Cell host & microbe* **5**:476-86.
7. **Rankin, J. D., and R. J. Taylor.** 1966. The estimation of doses of *Salmonella typhimurium* suitable for the experimental production of disease in calves. *The Veterinary record* **78**:706-7.
8. **Simon, R., U. Priefer, and A. Puhler.** 1983. A broad host range mobilization system for in vivo genetic engineering: transposon mutagenesis in Gram-negative bacteria. *Bio/Technology* **1**:784-791.
9. **Stojiljkovic, I., A. J. Baumler, and F. Heffron.** 1995. Ethanolamine utilization in *Salmonella typhimurium*: nucleotide sequence, protein expression, and mutational analysis of the *cchA cchB eutE eutJ eutG eutH* gene cluster. *Journal of bacteriology* **177**:1357-66.
10. **Winter, S. E., P. Thiennimitr, M. G. Winter, B. P. Butler, D. L. Huseby, R. W. Crawford, J. M. Russell, C. L. Bevins, L. G. Adams, R. M. Tsois, J. R. Roth, and A.**

- J. Baumber.** 2010. Gut inflammation provides a respiratory electron acceptor for Salmonella. *Nature* **467**:426-9.
11. **Zhang, S., R. L. Santos, R. M. Tsohis, S. Miold, W. D. Hardt, L. G. Adams, and A. J. Baumber.** 2002. Phage mediated horizontal transfer of the sopE1 gene increases enteropathogenicity of Salmonella enterica serotype Typhimurium for calves. *FEMS Microbiol Lett* **217**:243-7.
